# Supplementary material for: Degradation of sulfadiazine in water by a UV/O3process: performance and degradation pathway
Source: Royal Society of Chemistry journal article supplement (doi:10.1039/c6ra09078h), 2016-01-01
Supplement: c6ra09078h1.pdf [file c6ra09078h1.pdf]

## Supplementary Data

### Degradation of sulfadiazine in water by UV/O<sub>3</sub> process: Performance and degradation pathway

Wanqian Guo<sup>1\*</sup>, Zizeng Yang<sup>1</sup>, Juanshan Du<sup>1</sup>, Renli Yin<sup>1</sup>, Xianjiao Zhou<sup>1</sup>, Shuilin Jin<sup>2</sup> and Nanqi Ren<sup>1</sup>

Table S1 Lengths of bonds in SDZ molecule

| Bond     | Values | Bond     | Values | Bond      | Values | Bond      | Values |
|----------|--------|----------|--------|-----------|--------|-----------|--------|
| R(1, 2)  | 1.3914 | R(4, 5)  | 1.3428 | R(8, 11)  | 1.7671 | R(14, 15) | 1.4134 |
| R(1, 6)  | 1.3395 | R(5, 6)  | 1.337  | R(11, 12) | 1.4024 | R(14, 17) | 1.3724 |
| R(1, 18) | 1.0876 | R(5, 7)  | 1.3918 | R(11, 16) | 1.4009 | R(15, 16) | 1.3859 |
| R(2, 3)  | 1.3942 | R(7, 8)  | 1.7032 | R(12, 13) | 1.385  | R(15, 24) | 1.0858 |
| R(2, 19) | 1.0827 | R(7, 21) | 1.0143 | R(12, 22) | 1.0845 | R(16, 25) | 1.0827 |
| R(3, 4)  | 1.337  | R(8, 9)  | 1.465  | R(13, 14) | 1.4143 | R(17, 26) | 1.0097 |
| R(3, 20) | 1.0877 | R(8, 10) | 1.4702 | R(13, 23) | 1.0858 | R(17, 27) | 1.0097 |

Table S2 Charges of atoms in SDZ molecule

| Atoms | charges | Atoms | charges | Atoms | charges | Atoms | charges |
|-------|---------|-------|---------|-------|---------|-------|---------|
| 1C    | 0.065   | 8S    | 2.332   | 15C   | -0.294  | 22H   | 0.274   |
| 2C    | -0.344  | 9O    | -0.957  | 16C   | -0.190  | 23H   | 0.262   |
| 3C    | 0.063   | 10O   | -0.978  | 17N   | -0.851  | 24H   | 0.262   |
| 4N    | -0.525  | 11C   | -0.402  | 18H   | 0.252   | 25H   | 0.279   |
| 5C    | 0.580   | 12C   | -0.199  | 19H   | 0.275   | 26H   | 0.441   |
| 6N    | -0.528  | 13C   | -0.289  | 20H   | 0.253   | 27H   | 0.440   |
| 7N    | -0.895  | 14C   | 0.194   | 21H   | 0.479   |       |         |
